# Supplementary material for: Nanocellulose templated growth of ultra-small bismuth nanoparticles for enhanced radiation therapy
Source: Royal Society of Chemistry journal article supplement (doi:10.1039/c7nr06462d), 2018-01-01
Supplement: c7nr06462d1.pdf [file c7nr06462d1.pdf]

## SI Information

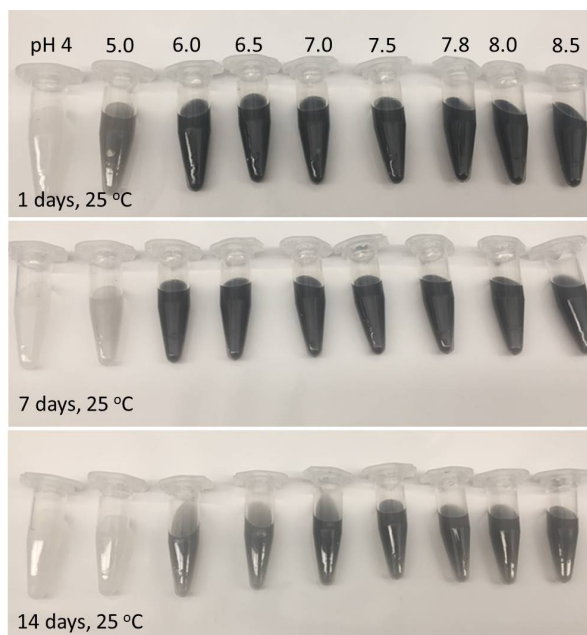

Figure SI 1 Bismuth nanoparticles in a series of pH conditions

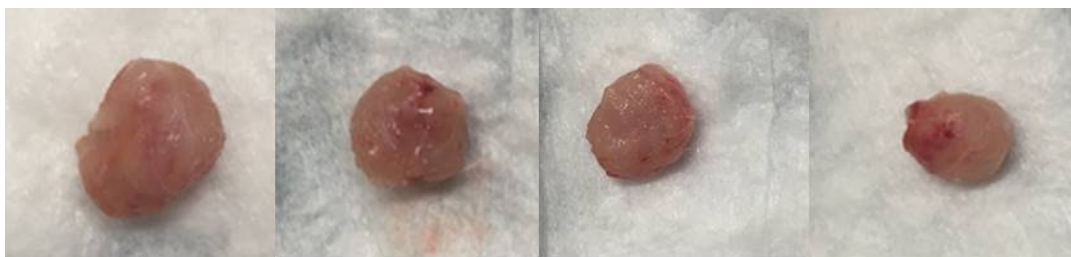

Figure SI 2. Digital images of tumor after different treatment at 7 days. From left to right side, they stand for PBS, PBS with radiation, bismuth nanoparticles without radiation, and bismuth nanoparticles with radiation, respectively.
